# Supplementary material
Source: HighWire-hosted journal article supplement (https://jech.bmj.com/content/71/6/550)
Supplement: inline-supplementary-material-1 [file inline-supplementary-material-1.pdf]

## Appendix

### Sex differences in the relationship between socioeconomic status and cardiovascular disease: a systematic review and meta-analysis

## **Appendix methods: Search terms used**

"female", "women", "male", "men", "sex", "cardiovascular disease", "coronary heart disease", "myocardial infarction", "stroke", "cerebrovascular disease", "socioeconomic factors", "social class", "income", "education\*", "occupation", "socio\*", "inequit\*", "inequal\*", "disparit\*", "disadvantage", "cohort\*", "prospective\*", "longitudinal\*", "population-based", "ecologic study", "registries", "census".

Use of an asterisk denotes an open ended search term. No limits were placed on the basis of language, country or publication date.

## Appendix figure legends

Appendix figure 1: Multiple-adjusted pooled relative risk of cardiovascular disease outcomes associated with lowest versus highest socioeconomic status in men and women. SES: Socioeconomic status.

Appendix figure 2: Funnel plot with pseudo 95% confidence limits for the age-adjusted data comparing lowest to highest level of education. a) For data in Figure 3 (CHD) ; b) For data in Figure 4 stroke; c) For data in Figure 5 (CVD).

Appendix figure 3: Age-adjusted and multiple-adjusted women-to-men ratio of relative risks of coronary heart disease, highest compared to lowest area level disadvantage.

Appendix figure 4: Age-adjusted and multiple-adjusted women-to-men ratio of relative risks of coronary heart disease, lowest compared to highest income level.

Appendix figure 5: Age-adjusted and multiple-adjusted women-to-men ratio of relative risks of coronary heart disease, manual compared to non-manual occupations.

Appendix figure 6: Age-adjusted and multiple-adjusted women-to-men ratio of relative risks of stroke, highest compared to lowest area level disadvantage.

Appendix figure 7: Age-adjusted and multiple-adjusted women-to-men ratio of relative risks of stroke, lowest compared to highest income level.

Appendix figure 8: Age-adjusted and multiple-adjusted women-to-men ratio of relative risks of stroke, manual compared to non-manual occupations.

Appendix figure 9: Age-adjusted and multiple-adjusted women-to-men ratio of relative risks of cardiovascular disease, highest compared to lowest area level disadvantage.

Appendix figure 10: Age-adjusted and multiple-adjusted women-to-men ratio of relative risks of cardiovascular disease, manual compared to non-manual occupation.

Appendix figure 11: Age-adjusted women-to-men ratio of relative risks of cardiovascular disease outcomes by subgroup, lowest compared to highest educational attainment

\*analysis are conducted using individual participant data (the Asia Pacific Cohort Studies Collaboration, the Atherosclerosis Risk in Communities Study, the National Health and Nutrition Examination Survey III, and the Scottish Heart Health Extended Cohort Study).

Appendix figure 12: Age-adjusted women-to-men ratio of relative risks of cardiovascular disease outcomes by primary compared to secondary or compared to tertiary educational attainment. Analysis were conducted using individual participant data (the Asia Pacific Cohort Studies Collaboration, the Atherosclerosis Risk in Communities Study, the National Health and Nutrition Examination Survey III, and the Scottish Heart Health Extended Cohort Study).

**Appendix table 1: Quality assessment of the included studies**

| <b>Study</b>                                         | <b>S1</b> | <b>S2</b> | <b>S3</b> | <b>S4</b> | <b>C1</b> | <b>O1</b> | <b>O2</b> | <b>O3</b> | <b>Sum</b> |
|------------------------------------------------------|-----------|-----------|-----------|-----------|-----------|-----------|-----------|-----------|------------|
| ARIC (1)                                             | 1         | 1         | 1         | 1         | 2         | 1         | 1         | 1         | 9          |
| APCSC-ANZ (2, 3)                                     | 1         | 1         | 1         | 1         | 2         | 1         | 1         | 1         | 9          |
| APCSC-Asia (2, 3)                                    | 1         | 1         | 1         | 1         | 2         | 1         | 1         | 1         | 9          |
| ARIC (4)                                             | 1         | 1         | 1         | 1         | 2         | 1         | 1         | 1         | 9          |
| Bas Rhin registry (5)                                | 1         | 1         | 1         | 0         | 2         | 1         | 1         | 1         | 8          |
| BASIC (6)                                            | 1         | 1         | 1         | 1         | 2         | 1         | 1         | 1         | 9          |
| CALIBER (7)                                          | 1         | 1         | 1         | 1         | 2         | 1         | 1         | 1         | 9          |
| CCHS; GPS (8)                                        | 1         | 1         | 1         | 1         | 2         | 1         | 1         | 1         | 9          |
| CCM follow-up Study (9)                              | 1         | 1         | 1         | 1         | 2         | 0         | 1         | 1         | 8          |
| CPSII Nutrition Cohort (44)                          | 1         | 1         | 1         | 1         | 2         | 0         | 1         | 1         | 8          |
| CVDNOR (45)                                          | 1         | 1         | 1         | 1         | 2         | 1         | 1         | 1         | 9          |
| Dutch National Register (10)                         | 1         | 1         | 1         | 1         | 2         | 0         | 1         | 0         | 7          |
| Dutch National Register (11)                         | 1         | 1         | 1         | 1         | 2         | 1         | 1         | 0         | 8          |
| Entire Swedish population (12)                       | 1         | 1         | 1         | 0         | 2         | 1         | 1         | 0         | 7          |
| EPIC (13)                                            | 1         | 1         | 1         | 1         | 2         | 1         | 1         | 1         | 9          |
| EPIC Norfolk (14)                                    | 1         | 1         | 1         | 1         | 2         | 0         | 1         | 1         | 8          |
| EPIC Norfolk (15)                                    | 1         | 1         | 1         | 1         | 2         | 1         | 1         | 1         | 9          |
| FINAMI (16)                                          | 1         | 1         | 1         | 1         | 2         | 1         | 1         | 0         | 8          |
| FINMONICA stroke register (17)                       | 1         | 1         | 1         | 1         | 2         | 1         | 1         | 1         | 9          |
| FINRISK (18)                                         | 1         | 1         | 1         | 1         | 2         | 1         | 1         | 1         | 9          |
| French National Institute of Statistics (INSEE) (19) | 1         | 1         | 1         | 1         | 2         | 0         | 1         | 0         | 7          |
| HUNT-2 (20)                                          | 1         | 1         | 1         | 1         | 2         | 0         | 1         | 0         | 7          |
| ILMS (21)                                            | 1         | 1         | 1         | 1         | 2         | 0         | 1         | 1         | 8          |
| JACC (22)                                            | 1         | 1         | 1         | 1         | 2         | 0         | 1         | 0         | 7          |
| JMS (23)                                             | 1         | 1         | 1         | 1         | 2         | 1         | 1         | 1         | 9          |
| JPHC I (24)                                          | 1         | 1         | 1         | 1         | 2         | 1         | 1         | 1         | 9          |
| MATISS (25)                                          | 1         | 1         | 1         | 1         | 2         | 0         | 1         | 1         | 8          |
| MONICA Glasgow (26)                                  | 1         | 1         | 1         | 1         | 2         | 1         | 1         | 0         | 8          |
| MONICA Novobirsk (27)                                | 1         | 1         | 1         | 1         | 2         | 0         | 1         | 1         | 8          |
| MONICA; PAMELA (28)                                  | 1         | 1         | 1         | 1         | 2         | 1         | 1         | 1         | 9          |
| MORGAM (29)                                          | 1         | 1         | 1         | 1         | 2         | 0         | 1         | 1         | 8          |
| Mumbai Cohort Study (30)                             | 1         | 1         | 1         | 1         | 2         | 0         | 1         | 1         | 8          |
| Municipality of Barcelona (31)                       | 1         | 1         | 1         | 1         | 2         | 0         | 1         | 1         | 8          |
| NHANES I (32)                                        | 1         | 1         | 1         | 1         | 2         | 1         | 1         | 1         | 9          |
| NHANES III (33)                                      | 1         | 1         | 1         | 1         | 2         | 1         | 1         | 1         | 9          |
| NHANES I (34)                                        | 1         | 1         | 1         | 1         | 2         | 1         | 1         | 1         | 9          |
| NIH-AARP Diet and Health Study (35)                  | 1         | 1         | 1         | 1         | 2         | 0         | 1         | 0         | 7          |
| NSW-ISC (36)                                         | 1         | 1         | 1         | 0         | 2         | 0         | 1         | 0         | 6          |
| PCCS; NEMESIS; ARCOS (37)                            | 1         | 1         | 1         | 1         | 2         | 1         | 1         | 0         | 8          |

|                                                        |   |   |   |   |   |   |   |   |   |
|--------------------------------------------------------|---|---|---|---|---|---|---|---|---|
| Population and Housing census (38)                     | 1 | 1 | 1 | 1 | 2 | 1 | 1 | 1 | 9 |
| Population census Malmö (39)                           |   | 1 | 1 | 1 | 2 | 1 | 1 | 0 | 7 |
| Population registry of Central and Capital Region (40) | 1 | 1 | 1 | 1 | 2 | 1 | 1 | 0 | 8 |
| Renfrew/Parsley (41)                                   | 1 | 1 | 1 | 1 | 2 | 1 | 1 | 0 | 8 |
| Renfrew/Parsley (42)                                   | 1 | 1 | 1 | 1 | 2 | 1 | 1 | 0 | 8 |
| SHHEC (43)                                             | 1 | 1 | 1 | 1 | 2 | 1 | 1 | 1 | 9 |
| Swedish Work and Mortality Database (44)               | 1 | 1 | 1 | 1 | 2 | 0 | 1 | 1 | 8 |
| Three Norwegian counties (45)                          | 1 | 1 | 1 | 1 | 2 | 0 | 1 | 0 | 7 |
| TLS (46)                                               | 1 | 1 | 1 | 1 | 2 | 1 | 1 | 0 | 8 |
| Whitehall (47)                                         | 1 | 1 | 0 | 1 | 2 | 1 | 1 | 0 | 7 |

Citation number in parentheses. See appendix table 2 for full study names

Studies were rated on quality assessment criteria according to a modified version of the Newcastle-Ottawa Quality assessment scale listed on the next page (\*studies received one point for the achievement of these criteria):

## Quality assessment criteria

### Selection

#### S1) Representativeness of the exposed cohort

- a) truly representative of the general population\*
- b) somewhat representative of the general population
- c) selected group e.g. patient groups
- d) no description of the derivation of the cohort

#### S2) Selection of the non exposed cohort

- a) drawn from the same community as the exposed cohort \*
- b) drawn from a different source
- c) no description of the derivation of the non exposed cohort

#### S3) Ascertainment of exposure

- a) secure record (validated events) \*
- b) structured interview
- c) written self report
- d) no description

#### S4) Demonstration that outcome of interest was not present at start of study

- a) yes \*
- b) no

### Comparability

#### C1) Comparability of cohorts on the basis of the design or analysis

- a) study controls for age\*
- b) study does not control for additional factors in baseline model adjusted for age (cohort or year ok)\*

### Outcome

#### O1) Assessment of outcome

- a) independent blind assessment or record linkage of fatal and non-fatal events\*
- b) independent blind assessment or record linkage of fatal events
- c) self report
- d) no description

#### O2) Was follow-up long enough for outcomes to occur

- a) yes (at least 3 years) \*
- b) no

#### O3) Adequacy of follow up of cohorts

- a) complete follow up - all subjects accounted for \*
- b) subjects lost to follow up unlikely to introduce bias - > 10% follow up, or description provided of those lost \*
- c) follow up rate < 90% and no description of those lost
- d) no statement

**Appendix table 2:** Characteristics of included studies

| Study name (citation number) | Baseline study years | Country         | Follow-up (years) | n (% women)                      | Age range | CHD, n (% women) | Stroke, n (%women) | CVD, n (%women) | Fatal (F), non-fatal (NF) | SEPSSES indicator (no categories)     | Maximum adjustment                               |
|------------------------------|----------------------|-----------------|-------------------|----------------------------------|-----------|------------------|--------------------|-----------------|---------------------------|---------------------------------------|--------------------------------------------------|
| APCSC-ANZ (2, 3)             | 1989-96              | ANZ             | 8                 | 91743 (55)                       | 20-104    | 2156 (21)        | 725 (30)           | 3232 (24)       | F & NF                    | Education (3)                         | Age, DM, smoking, SBP, TC, HDL-C                 |
| APCSC-Asia (2, 3)            | 1961-93              | Asia            | 7                 | 227123 (29)                      | 20-107    | 583 (34)         | 1263 (34)          | 2726 (35)       | F &NF                     | Education (3)                         | Age, DM, smoking, SBP, TC, HDL-C                 |
| ARIC (1, 4)                  | 1987-89              | USA             | 10                | 15732 (55)                       | 45-64     | 1616 (42)        | 930 (52)           | 2339 (45)       | F & NF                    | Education (3)<br>Area Deprivation (3) | Age, DM, smoking, SBP, TC, HDL-C                 |
| Bas Rhin registry (5)        | 2000-03              | France          | 4                 | 450000 (NA)                      | 35-74     | 1193 (24)        | NA                 | NA              | F & NF                    | Area Deprivation (5)                  | age                                              |
| BASIC (6)                    | 2000                 | USA             | 3                 | Population of Nueces, Texas (NA) | 73        | NA               | 1247 (NA)          | NA              | N                         | Area Deprivation (2)                  | age, ethnicity                                   |
| CALIBER (7)                  | 1997-10              | UK              | 6                 | 1937360 (51)                     | 30+       | 33769 (42)       | 17641 (56)         | 78618 (47)      | F & NF                    | Area Deprivation (5)                  | Age, ethnicity, smoking, DM, SBP, TC, HDL-C, BMI |
| CCHS; GPS (8)                | 1976 -94             | Denmark         | 32                | 22782 (54)                       | 20+       | 3061 (41)        | NA                 | NA              | F & NF                    | Income (4)                            | age, smoking, alcohol, SBP, TC, BMI, PA, DM      |
| CCM follow-up Study (9)      | 1991                 | Canada          | 10                | 1091800 (39)                     | 35-64     | NA               | NA                 | NA              | F                         | Education (4)<br>Occupation (5)       | age                                              |
| CPSII Nutrition Cohort (48)  | 1992                 | USA             | 8                 | 179383 (47)                      | 50-75     | 3451 (23)        | 944 (38)           | NA              | F                         | Education (5)<br>Area Deprivation (6) | age                                              |
| CVDNOR (49)                  | 2001-09              | Norway          | 8                 | Norwegian population             | 35-94     | 141332 (40)      | NA                 | NA              | F                         | Education (3)                         | age                                              |
| Dutch National Register (10) | 1995-00              | The Netherlands | 5                 | 11381474 (45)                    | 0-59      | NA               | NA                 | NA              | F                         | Area Deprivation (2)                  | age                                              |
| Dutch National Register (11) | 1997-07              | The Netherlands | 10                | Dutch population                 | 35-95     | 317563 (37)      | NA                 | NA              | F & NF                    | Area Deprivation (5)                  | age                                              |



|                                                      |         |         |    |              |       |            |           |            |        |                                               |                                                                                                                             |
|------------------------------------------------------|---------|---------|----|--------------|-------|------------|-----------|------------|--------|-----------------------------------------------|-----------------------------------------------------------------------------------------------------------------------------|
| Entire Swedish population (12)                       | 1995    | Sweden  | 4  | 2637628 (50) | 40-64 | 52360 (27) | NA        | NA         | N      | Income (5)<br>Area Deprivation (10)           | age                                                                                                                         |
| EPIC (13)                                            | 1992-96 | Spain   | 10 | 41438 (62)   | 30-65 | 538 (20)   | NA        | NA         | F & NF | Education (5)                                 | age, paternal occupation, smoking, DM, hypertension, hyperlipidemia, CVD drugs use, and OCT use, HRT, postmenopausal status |
| EPIC Norfolk (14)                                    | 1993-97 | UK      | 13 | 22486 (55)   | 39-79 | NA         | NA        | 683 (39)   | F      | Occupation (6)                                | Age, smoking, BMI                                                                                                           |
| EPIC Norfolk (15)                                    | 1993-97 | UK      | 10 | 22486 (55)   | 39-79 | NA         | 683 (52)  | NA         | F & NF | Occupation (6)                                | Age, BMI, smoking, DM, SBP, TC                                                                                              |
| FINAMI (16)                                          | 1988    | Finland | 15 | 233287 (55)  | 35-99 | 15374 (47) | NA        | NA         | F & NF | Income (5)<br>Education (2)<br>Occupation (3) | Age                                                                                                                         |
| FINMONICA stroke register (17)                       | 1982-83 | Finland | 10 | 390564 (NA)  | 25-74 | NA         | 6903 (43) | NA         | F & NF | Income (3)<br>Education (3)                   | Age                                                                                                                         |
| FINRISK (18)                                         | 1982-97 | Finland | 5  | 19272 (53)   | 35-64 | 1137 (31)  | NA        | NA         | F & NF | Occupation (6)                                | Age, smoking, alcohol, PA, TC, BP, BMI                                                                                      |
| French National Institute of Statistics (INSEE) (19) | 1990-99 | France  | 9  | 213874 (51)  | 30-64 | NA         | NA        | 11724 (31) | F      | Education (5)<br>Occupation (10)              | Age                                                                                                                         |
| HUNT-2 (20)                                          | 1995-97 | Norway  | 9  | 44128 (53)   | 30-99 | 551 (40)   | NA        | NA         | F      | Education (3)                                 | Age, chronic illness, smoking, PA, alcohol                                                                                  |
| ILMS (21)                                            | 1983    | Israel  | 10 | 152150 (52)  | 45-89 | 7529 (59)  | NA        | 14732 (45) | F      | Education (3)                                 | Age                                                                                                                         |
| JACC (22)                                            | 1988-90 | Japan   | 11 | 39999 (58)   | 40-79 | 439 (42)   | NA        | NA         | F      | Education (3)                                 | Age                                                                                                                         |
| JMS (23)                                             | 1992-95 | Japan   | 12 | 10640 (61)   | 57    | 84 (32)    | 367 (46)  | NA         | F & NF | Education (3)<br>Occupation (3)               | Age, TC, PA, alcohol, marital status, smoking, obesity, hypertension, DM                                                    |
| JPHCI (24)                                           | 1990    | Japan   | 13 | 39228 (52)   | 40-59 | NA         | NA        | 1799 (35)  | F & NF | Education (3)                                 | Age, smoking, alcohol, PA, BMI, dietary intake, screening tests                                                             |
| MATISS (25)                                          | 1983    | Italy   | 17 | 8512 (53)    | 20-75 | NA         | NA        | 288 (NA)   | F      | Education (4)                                 | Age, smoking, SBP, BMI, HDL-C                                                                                               |

|                                                        |         |           |     |                                           |       |             |            |             |        |                              |                                                                                                |
|--------------------------------------------------------|---------|-----------|-----|-------------------------------------------|-------|-------------|------------|-------------|--------|------------------------------|------------------------------------------------------------------------------------------------|
| MONICA Glasgow (26)                                    | 1985    | UK        | 6   | 195831 (51)                               | 25-64 | 5542 (28)   | NA         | NA          | F & NF | Area Deprivation (4)         | Age                                                                                            |
| MONICA Novobirsk (27)                                  | 1984-95 | Russia    | 10  | 11404 (43)                                | 25-64 | 293 (20)    | 146 (30)   | 524 (25)    | F      | Education (4)                | Age, smoking, TC, SBP, alcohol, BMI                                                            |
| MONICA; PAMELA (28)                                    | 1986-92 | Italy     | 12  | 5084 (51)                                 | 35-74 | 319 (24)    | 229 (21)   | NA          | F & NF | Education (2)                | Age, SBP, DM, smoking, TC, HDL-C, BMI (women only)                                             |
| MORGAM (29)*                                           | 1982-97 | Europe    | 10  | 68455 (43)                                | 40-64 | NA          | NA         | 2878 (21)   | F      | Education (3)                | Age, SBP, TC, smoking                                                                          |
| Mumbai Cohort Study (30)                               | 1991-97 | India     | 6   | 148173 (40)                               | 30+   | 2460 (31)   | 765 (40)   | 4451 (39)   | F      | Education (5)                | Age, smoking, BMI, religion, mother tongue                                                     |
| Municipality of Barcelona (31)                         | 1984    | Spain     | 9   | 20648 (44)                                | 15+   | NA          | NA         | 207 (14)    | F      | Occupation (6)               | Age                                                                                            |
| NHANES I (32)                                          | 1971-75 | USA       | 15  | 6025 (54)                                 | 25-74 | 1096 (44)   | NA         | NA          | F & NF | Education (4)                | Age, SBP, DBP, hypertension, TC, BMI, DM, smoking, alcohol, PA, marital status, race/ethnicity |
| NHANES I (34)                                          | 1971-75 | USA       | 20  | 4710 (53)                                 | 45-74 | NA          | 652 (51)   | NA          | F & NF | Education (4)<br>Income (4)  | Age, smoking, DM, history CHD, alcohol, PA, BP medication, SBP                                 |
| NHANES III (33)                                        | 1988    | USA       | 13  | 18603 (46)                                | 18-90 | 973 (51)    | 329 (58)   | 1337 (53)   | F      | Education (3)                | Age, DM, smoking, SBP, TC, HDL-C                                                               |
| NIH-AARP Diet and Health Study (35)                    | 1995-96 | USA       | 10  | 409775 (43)                               | 50-71 | NA          | NA         | 8952 (NA)   | F      | Area Deprivation (5)         | Age                                                                                            |
| NSW-ISC (36)                                           | 1991-92 | Australia | 4   | Inhabitants of NSW                        | 35-74 | 58506 (29)  | NA         | NA          | F & NF | Area (4)                     | Age                                                                                            |
| PCCS; NEMESIS; ARCOS (37)                              | 1995-02 | ANZ       | 1-3 | relevant population data from census (NA) | 15+   | NA          | 3077 (54)  | NA          | F      | Area Deprivation (5)         | Age                                                                                            |
| Population and Housing census (38)                     | 1987    | Sweden    | 23  | 2939771 (48)                              | 30-69 | 121496 (22) | 61421 (34) | NA          | F & NF | Occupation (5)               | Age                                                                                            |
| Population census Malmö (39)                           | 1990    | Sweden    | 10  | 69625 (51)                                | 40-65 | NA          | 1648 (38)  | NA          | F & NF | Income (4)<br>Occupation (7) | Age                                                                                            |
| Population registry of Central and Capital Region (40) | 2001    | Denmark   | 4   | 1727938 (55)                              | 30-66 | NA          | NA         | 126045 (48) | F & NF | Income (2)                   | Age, marital status                                                                            |

|                                                |         |        |    |                 |       |            |           |           |        |                                                            |                                                                          |
|------------------------------------------------|---------|--------|----|-----------------|-------|------------|-----------|-----------|--------|------------------------------------------------------------|--------------------------------------------------------------------------|
| Renfrew/<br>Parsley (41)                       | 1972    | UK     | 20 | 14947 (47)      | 45-64 | NA         | 1271 (53) | NA        | F & NF | Area<br>Deprivation (7)                                    | Age, smoking, SBP, DBP,<br>height, FEV, BMI, TC, DM,<br>history CHD      |
| Renfrew/<br>Parsley (42)                       | 1972    | UK     | 15 | 14952 (53)      | 45-64 | NA         | NA        | 1869 (39) | F      | Occupation (4)<br>Area<br>Deprivation (3)                  | Age, DBP, TC, BMI, FEV,<br>smoking, angina, ECG<br>ischaemia, bronchitis |
| SHHEC (43)                                     | 1984-87 | UK     | 16 | 13287 (51)      | 30-74 | 2592 (39)  | 1084 (43) | 3796 (41) | F & NF | Education (3)<br>Occupation (6)<br>Area<br>Deprivation (5) | Age, DM, smoking, SBP, TC,<br>HDL-C                                      |
| Swedish Work and<br>Mortality Database<br>(44) | 1990    | Sweden | 12 | 2825117<br>(49) | 30-64 | NA         | 4886 (33) | NA        | F      | Income (4)                                                 | Age                                                                      |
| Three Norwegian<br>counties (45)               | 1974-76 | Norway | 24 | 44684 (49)      | 35-49 | 1601 (21)  | NA        | 2335 (22) | F      | Education (2)                                              | Age, smoking, PA, marital<br>status, BMI, SBP, DBP,<br>cholesterol       |
| TLS (46)                                       | 1997    | Italy  | 5  | 523755 (52)     | 35-74 | 15114 (27) | NA        | NA        | F & NF | Education (3)                                              | Age                                                                      |
| Whitehall (47)                                 | 1985-88 | UK     | 5  | 10308 (33)      | 35-55 | 417 (36)   | NA        | NA        | N      | Occupation (6)                                             | Age                                                                      |

ANZ, Australia and New Zealand; APCSC-ANZ, Asia-Pacific Cohort Study Collaboration-Australia/New Zealand; APCSC-Asia, Asia-Pacific Cohort Study Collaboration-Asia; ARCOS, Auckland Regional Community Stroke Study; ARIC, Atherosclerosis Risk in Communities Study; BASIC, Brain Attack Surveillance in Corpus Christi Project; BMI, body mass index; BP, blood pressure; CALIBER, Cardiovascular disease research using Linked Bespoke studies and Electronic health Records; CCHS, Copenhagen City Heart Studies; CCM Follow-up Study, Canadian Census Mortality Follow-up Study; CHD, coronary heart disease; CPS II Nutrition Cohort, American Cancer Society Nutrition Cohort; CVD, cardiovascular disease; CVDNOR, Cardiovascular Disease in Norway Project; DBP, diastolic blood pressure; EPIC, European Prospective Investigation into Cancer and Nutrition; FEV, forced expiratory volume; GPS, Glostrup Population Studies; HDL-C, high density lipoprotein cholesterol; HRT, hormonal replacement therapy; HUNT, Nord-Trøndelag Health Study; ILMS, Israel Longitudinal Mortality Study; JACC, Japan Collaborative Cohort Study for the Evaluation of Cancer Risk; JMS, Jichi Medical School Cohort Study; JPHC, Japan Public Health Center-based Prospective Study; MATISS, Malattie Aterosclerotiche Istituto Superiore di Sanita; MONICA, Multinational MONitoring of trends and determinants in Cardiovascular disease; MORGAM, MONica Risk, Genetics, Archiving and Monograph; NA, not available; NEMESIS, Northeast Melbourne Stroke Incidence Study; NHANES, National Health and Nutrition Examination Survey; NHEFS, NHANES I Epidemiologic Follow-up Study; NIH-AARP, National Health Institute-American Association of Retired Persons; NSW-ISC, New South Wales Inpatient Statistics Collection; OCT, oral contraceptive therapy; PA, physical activity; PAMELA, pressioni Arteriose Monitorate E Loro Associazioni; PCS, Perth Community Stroke Study; SBP, systolic blood pressure; SHHEC, Scottish Heart Health Extended Cohort; TC, total cholesterol; TLS, Turin Longitudinal Study; UK, United Kingdom; USA, United States of America

\* When pooling estimates across countries within the MONica Risk, Genetics, Archiving and Monograph (MORGAM) project, (29) we excluded estimates from the UK due to overlap with the SHHEC study, which had a longer follow-up and a greater number of events.  
Study references are provided in the appendix reference list

**Appendix table 3:** Categorisation of educational attainment across included studies

| Studies                                         | Number of categories | Category thresholds                                                                                                                                   |
|-------------------------------------------------|----------------------|-------------------------------------------------------------------------------------------------------------------------------------------------------|
| APCSC - ANZ                                     | 3                    | None or primary, secondary, tertiary                                                                                                                  |
| APCSC - Asia                                    | 3                    | None or primary, secondary, tertiary                                                                                                                  |
| ARIC                                            | 3                    | <high school, high school graduate, some college, and > college graduate                                                                              |
| CCM follow-up Study                             | 4                    | <secondary graduation, secondary graduation, post-secondary diploma, university degree                                                                |
| CPSII Nutrition Cohort                          | 5                    | <high school, high school or vocational school, some college, college, graduate school                                                                |
| CVDNOR                                          | 3                    | Basic education (compulsory education), upper secondary education (high school or vocational school) and tertiary education (college or university)   |
| EPIC                                            | 5                    | No formal education, primary school, technical training, secondary school, and > university degree                                                    |
| FINAMI                                          | 2                    | Basic (<9 years of full-time education), secondary or higher                                                                                          |
| FINMONICA stroke register                       | 2                    | Basic, corresponding to ≤9 years of full-time education, and secondary or higher, corresponding to >9 years of full-time education                    |
| French Institute of National Statistics (INSEE) | 5                    | No diploma, primary, technical, secondary, university                                                                                                 |
| HUNT-2                                          | 3                    | Primary, secondary, tertiary                                                                                                                          |
| ILMS                                            | 3                    | 0 to 8 years (elementary), 9 to 12, and 13 years and over (high education)                                                                            |
| JACC                                            | 3                    | Followed education up to 15 years of age, up to 16-17 years of age, up to or over 18 years of age                                                     |
| JMS                                             | 3                    | Followed education up to 15 years of age, up to 16-17 years of age, ≥ 18 years of age                                                                 |
| JPHC I                                          | 3                    | Primary, secondary, tertiary                                                                                                                          |
| MATISS                                          | 4                    | None, primary, secondary, high                                                                                                                        |
| MONICA Novobirsk                                | 4                    | Primary (less than 8 years in total), secondary (9-12 years in total), higher secondary (more than 12 years in total), university (university degree) |
| MONICA; PAMELA                                  | 2                    | High, low                                                                                                                                             |
| MORGAM                                          | 3                    | Derived from cohort-specific, gender-specific and age-specific tertiles of the distribution of years of schooling                                     |
| Mumbai Cohort Study                             | 5                    | Illiterate, primary school, middle school, secondary school, college                                                                                  |
| NHANES I                                        | 4                    | Less than high school, high school, some college, college                                                                                             |
| NHANES III                                      | 3                    | < high school, high school graduate, some college, > college graduate                                                                                 |
| NHEFS                                           | 4                    | < 8 years in total, 8-11 years in total, 12 years in total, > 12 years in total                                                                       |
| SHHEC                                           | 3                    | None or primary, secondary, tertiary                                                                                                                  |
| Three Norwegian counties                        | 2                    | Low, high                                                                                                                                             |
| TLS                                             | 3                    | Low, medium, high                                                                                                                                     |

**Appendix table 4:** Age- and multiple CVD risk factor-adjusted ratios of women:men relative risks (95% confidence intervals) of CHD, stroke, and CVD, lowest compared to highest educational attainment (n=366,488).

|        | Age-adjusted RRR  | Multiple-adjusted RRR |
|--------|-------------------|-----------------------|
| CHD    | 1.35 (1.02, 1.79) | 1.32 (1.07, 1.63)     |
| Stroke | 1.00 (0.77, 1.32) | 1.00 (0.77, 1.31)     |
| CVD    | 1.19 (0.94, 1.50) | 1.22 (0.93, 1.59)     |

Ratios of relative risks were obtained from ARIC, APCSC, NHANES III, and SHHEC and pooled using random effects meta-analysis inverse variance weighting. Multiple-adjusted estimates are adjusted for age, total and HDL cholesterol, systolic blood pressure, smoking, and diabetes

**Appendix table 5:** Ratios of women:men relative risks (95% confidence intervals) before and after adjustment for diabetes and smoking. Data pooled over the 4 IPD studies using random effects meta-analysis inverse variance weighting.

|                                    | Diabetes          | Smoking           |
|------------------------------------|-------------------|-------------------|
| <b>CHD</b>                         |                   |                   |
| Basic adjustment <sup>1</sup>      | 1.32 (1.07, 1.63) | 1.27 (0.99, 1.62) |
| Additional adjustment <sup>2</sup> | 1.37 (1.03, 1.83) | 1.32 (1.07, 1.63) |
| <b>Stroke</b>                      |                   |                   |
| Basic adjustment <sup>1</sup>      | 1.00 (0.77, 1.31) | 0.90 (0.67, 1.22) |
| Additional adjustment <sup>2</sup> | 1.00 (0.77, 1.32) | 1.00 (0.77, 1.31) |
| <b>CVD</b>                         |                   |                   |
| Basic adjustment <sup>1</sup>      | 1.22 (0.93, 1.59) | 1.21 (0.84, 1.76) |
| Additional adjustment <sup>2</sup> | 1.23 (0.91, 1.67) | 1.22 (0.93, 1.59) |

<sup>1</sup> Adjusted for age, total and HDL cholesterol and systolic blood pressure and either smoking (for column 1) or diabetes (for column 2)

<sup>2</sup> Additionally adjusted for diabetes (for column 1) or smoking (for column 2)

Appendix figure 1

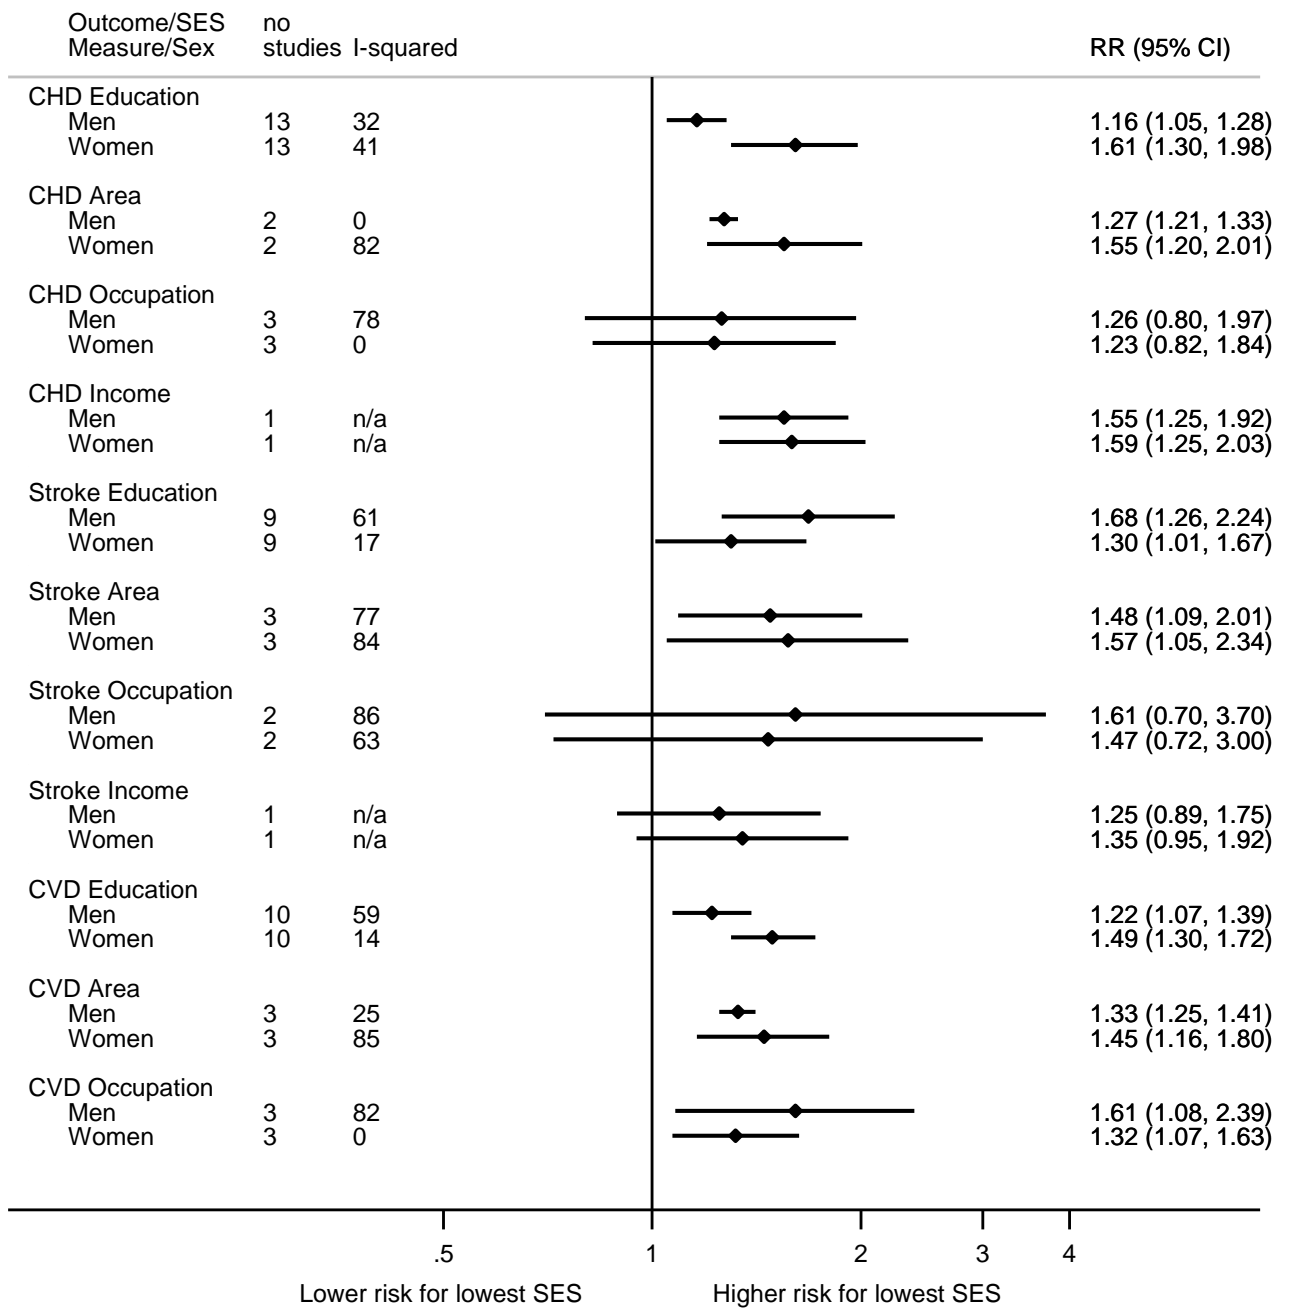

**Appendix figure 2**

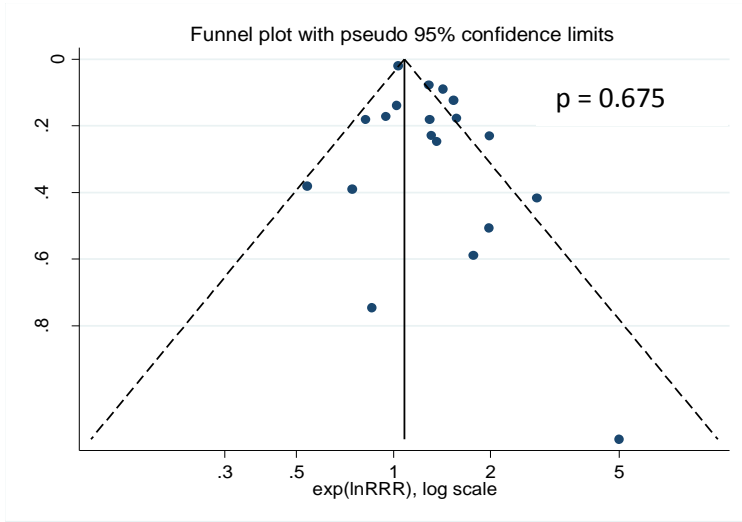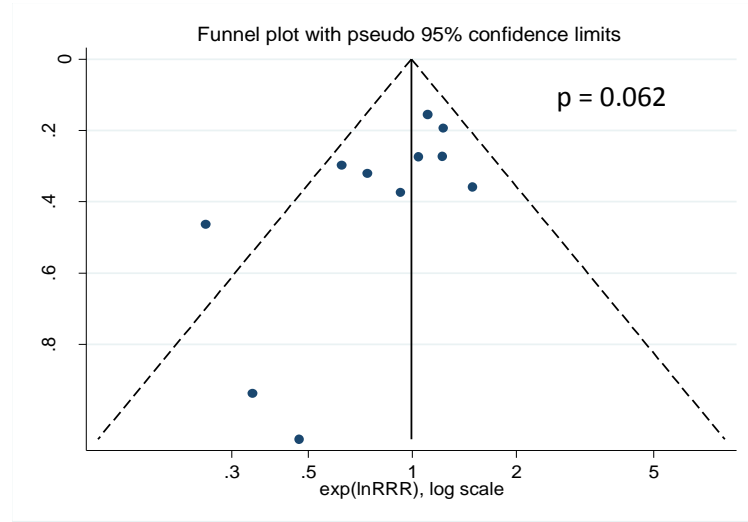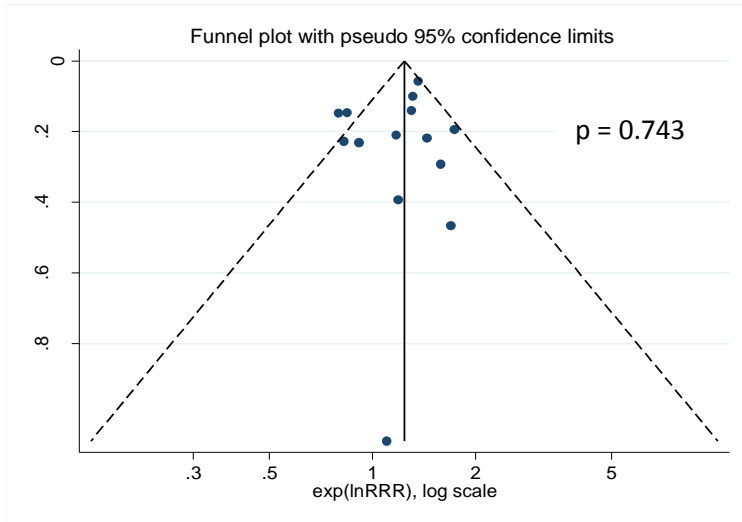



### Appendix figure 3

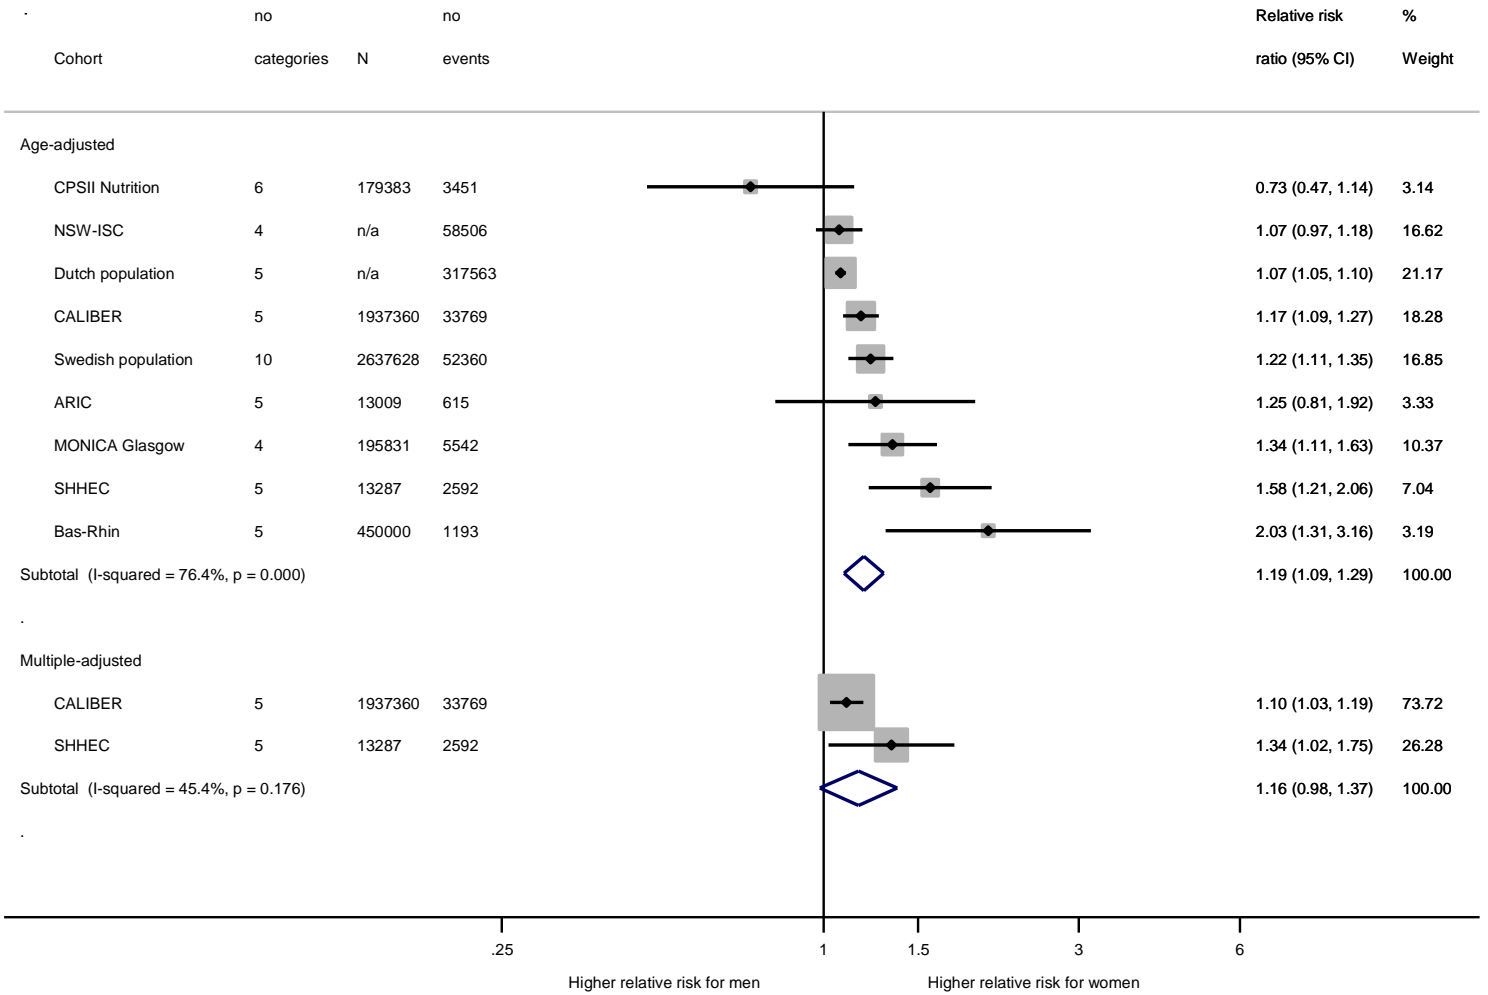

## Appendix figure 4

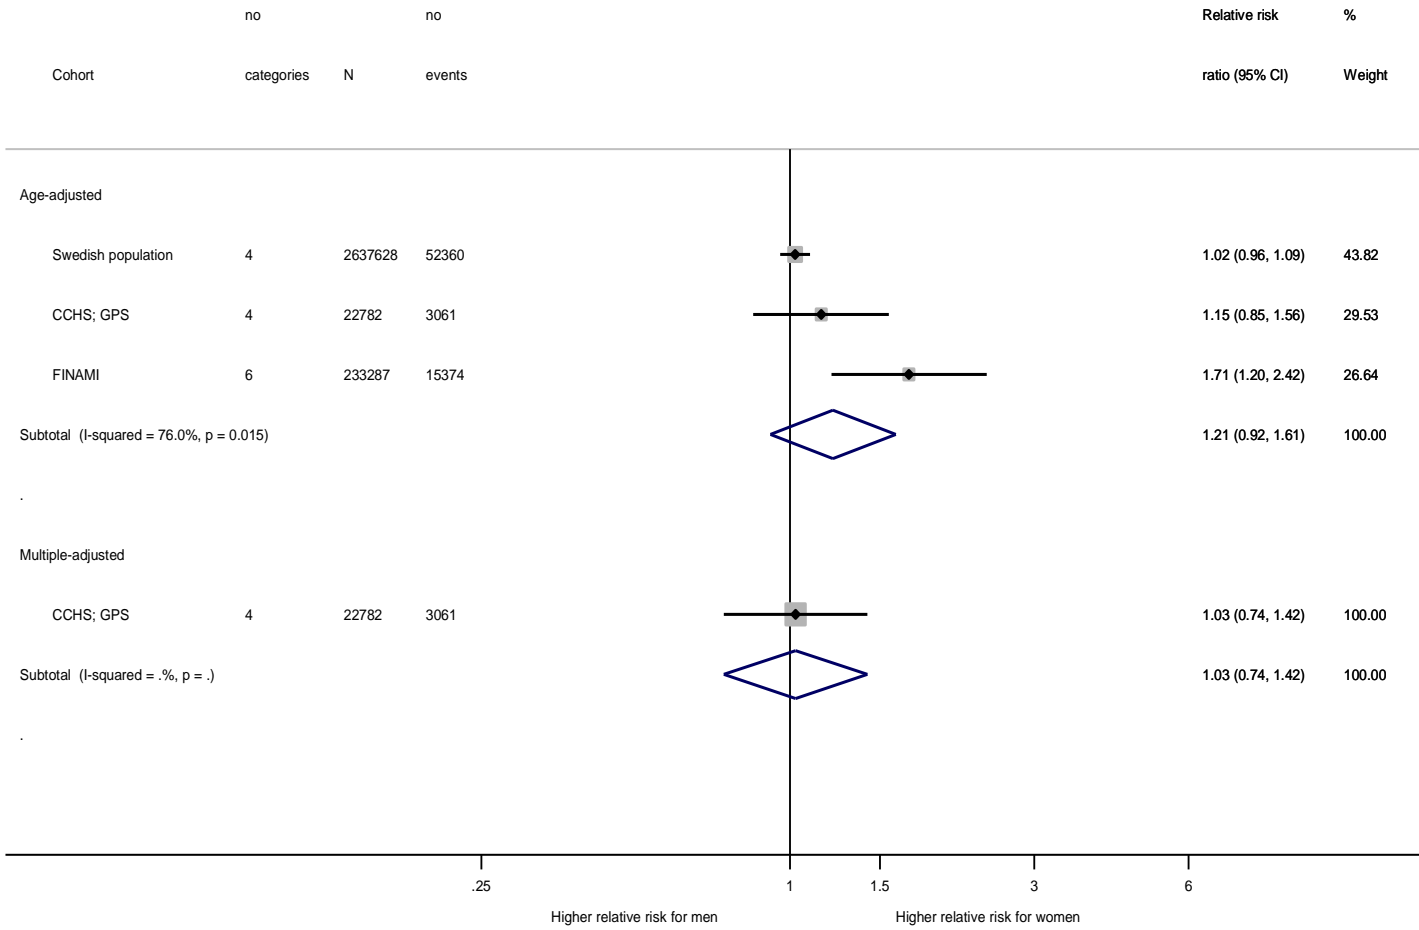

**Appendix figure 5**

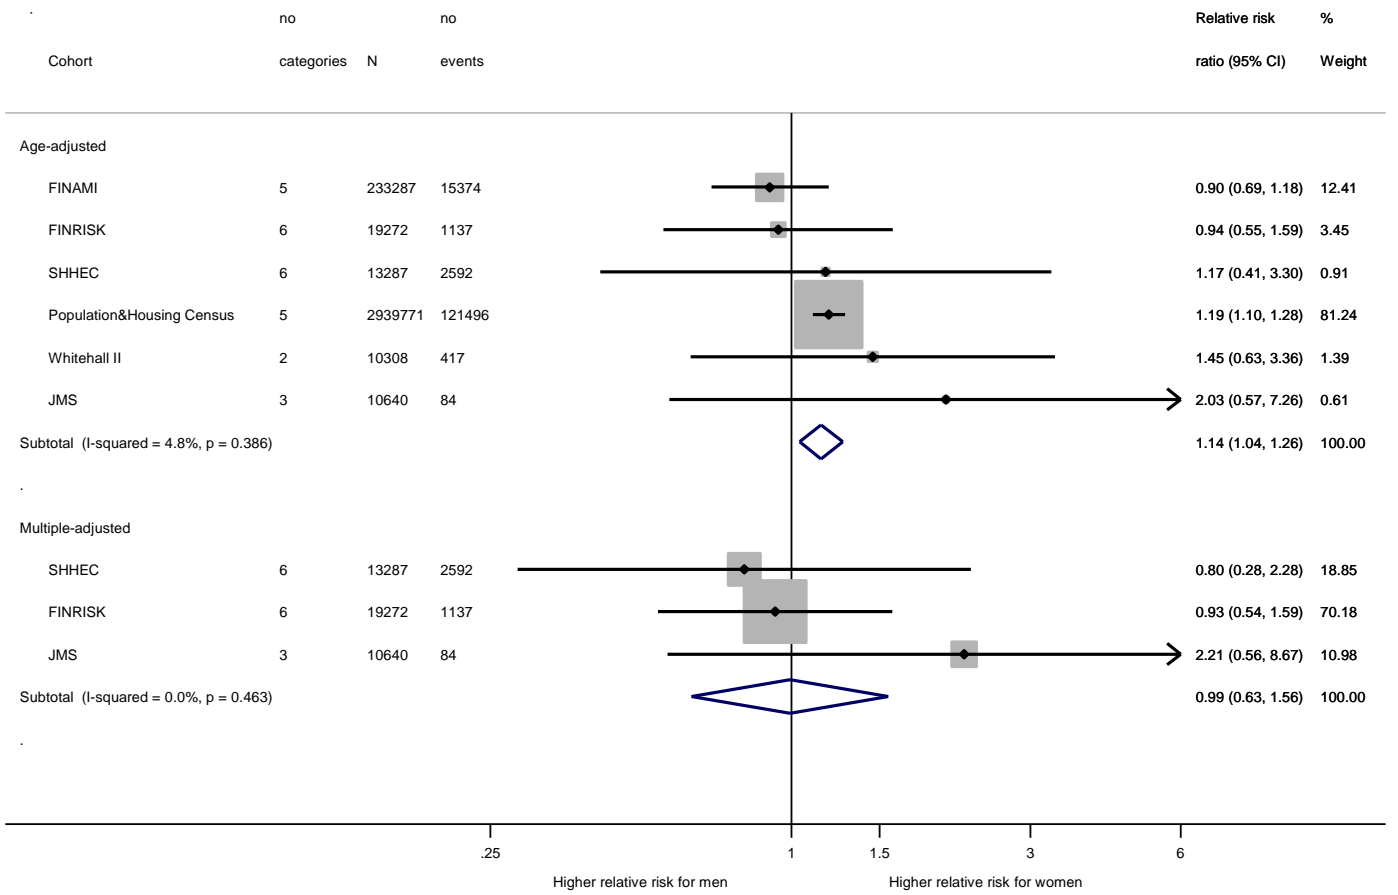



## Appendix figure 7

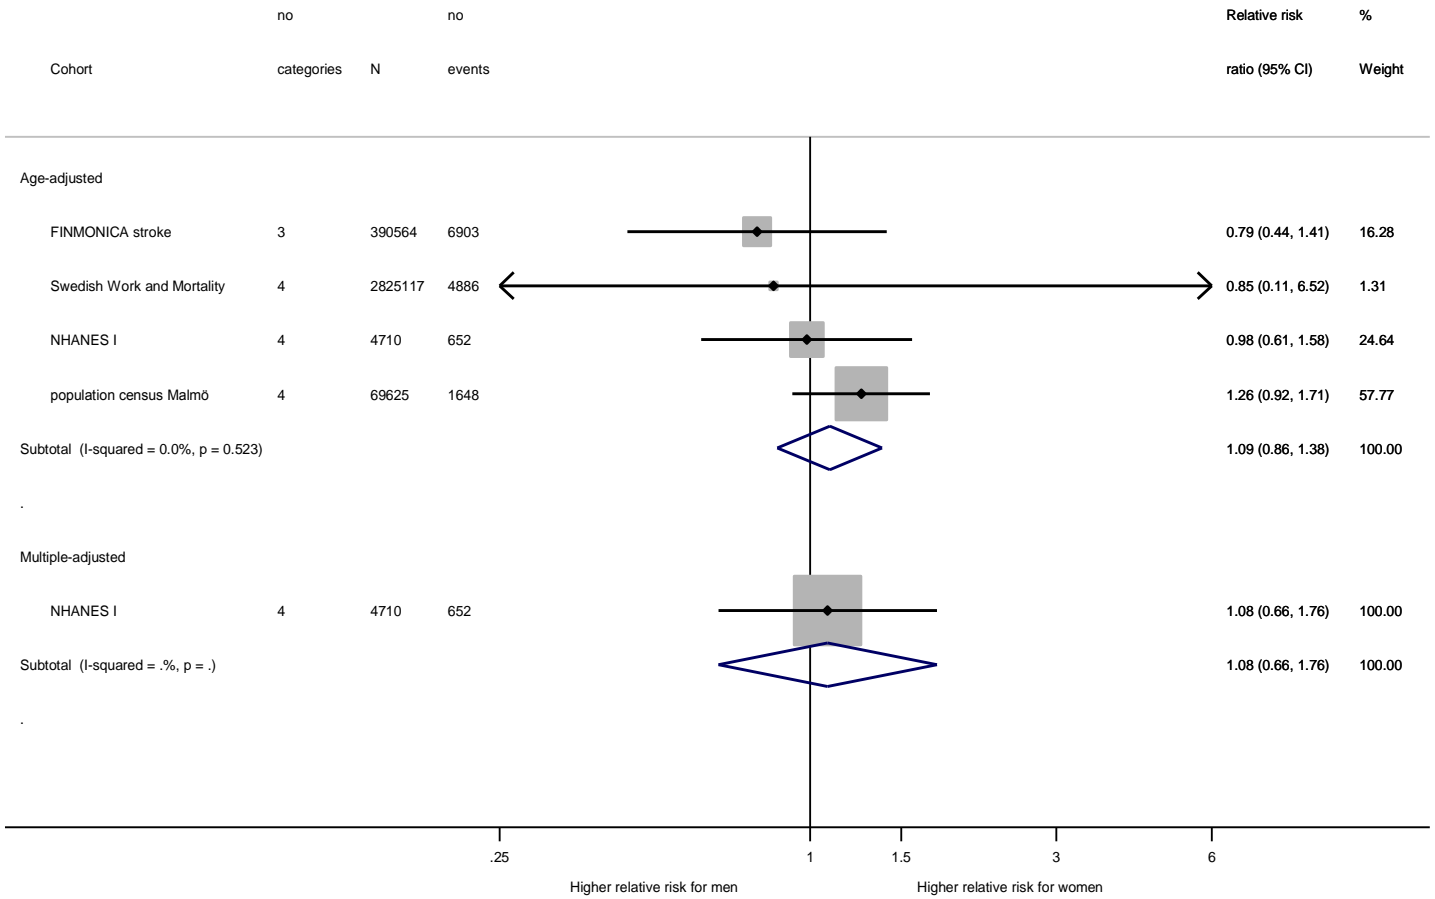

## Appendix figure 8

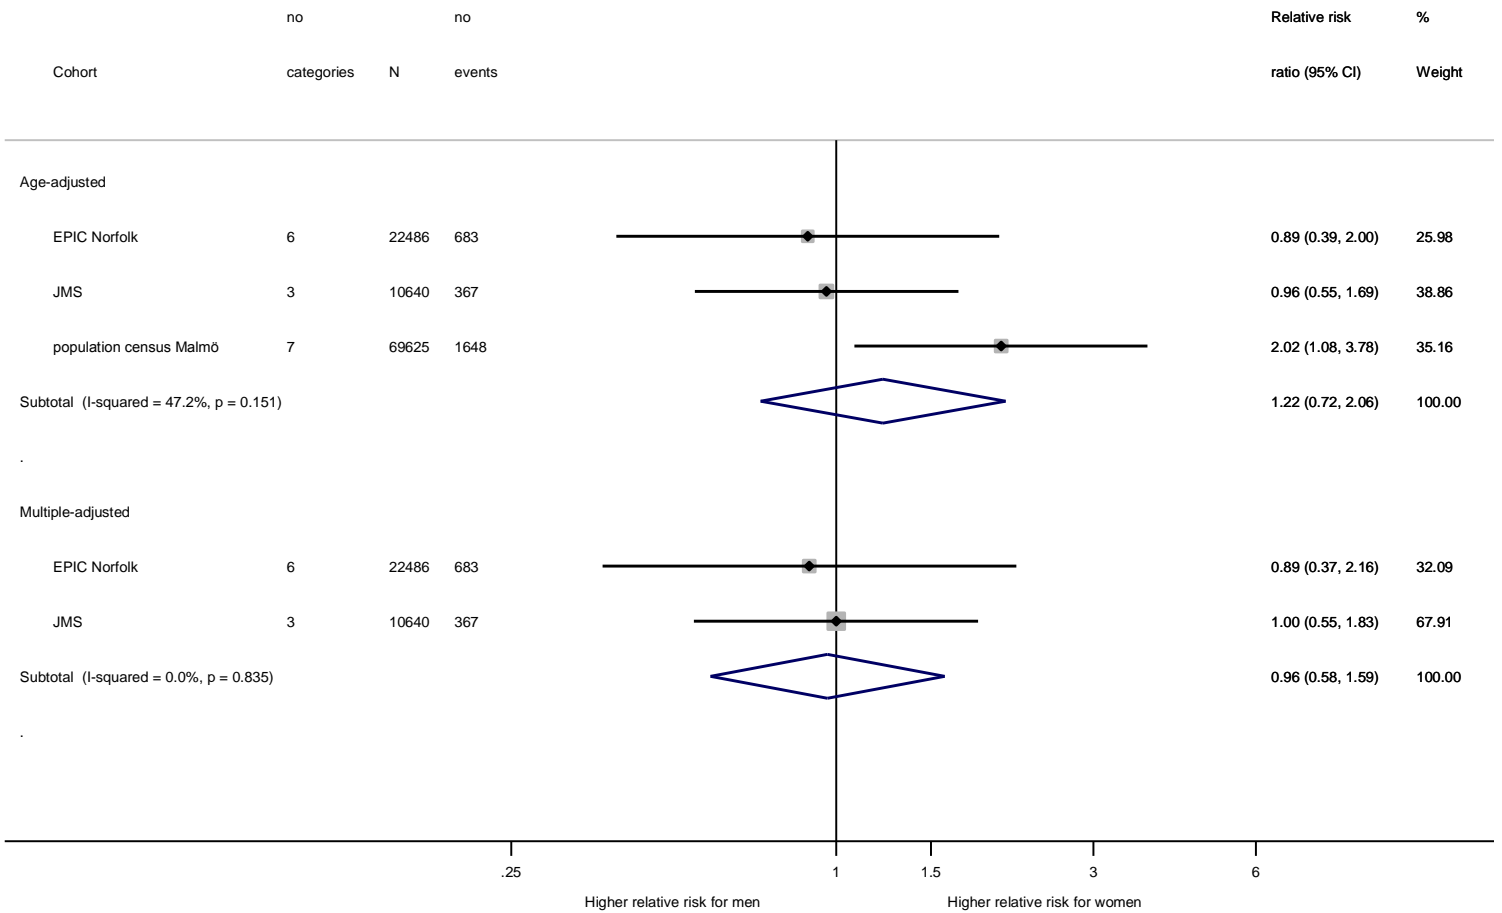

### Appendix figure 9

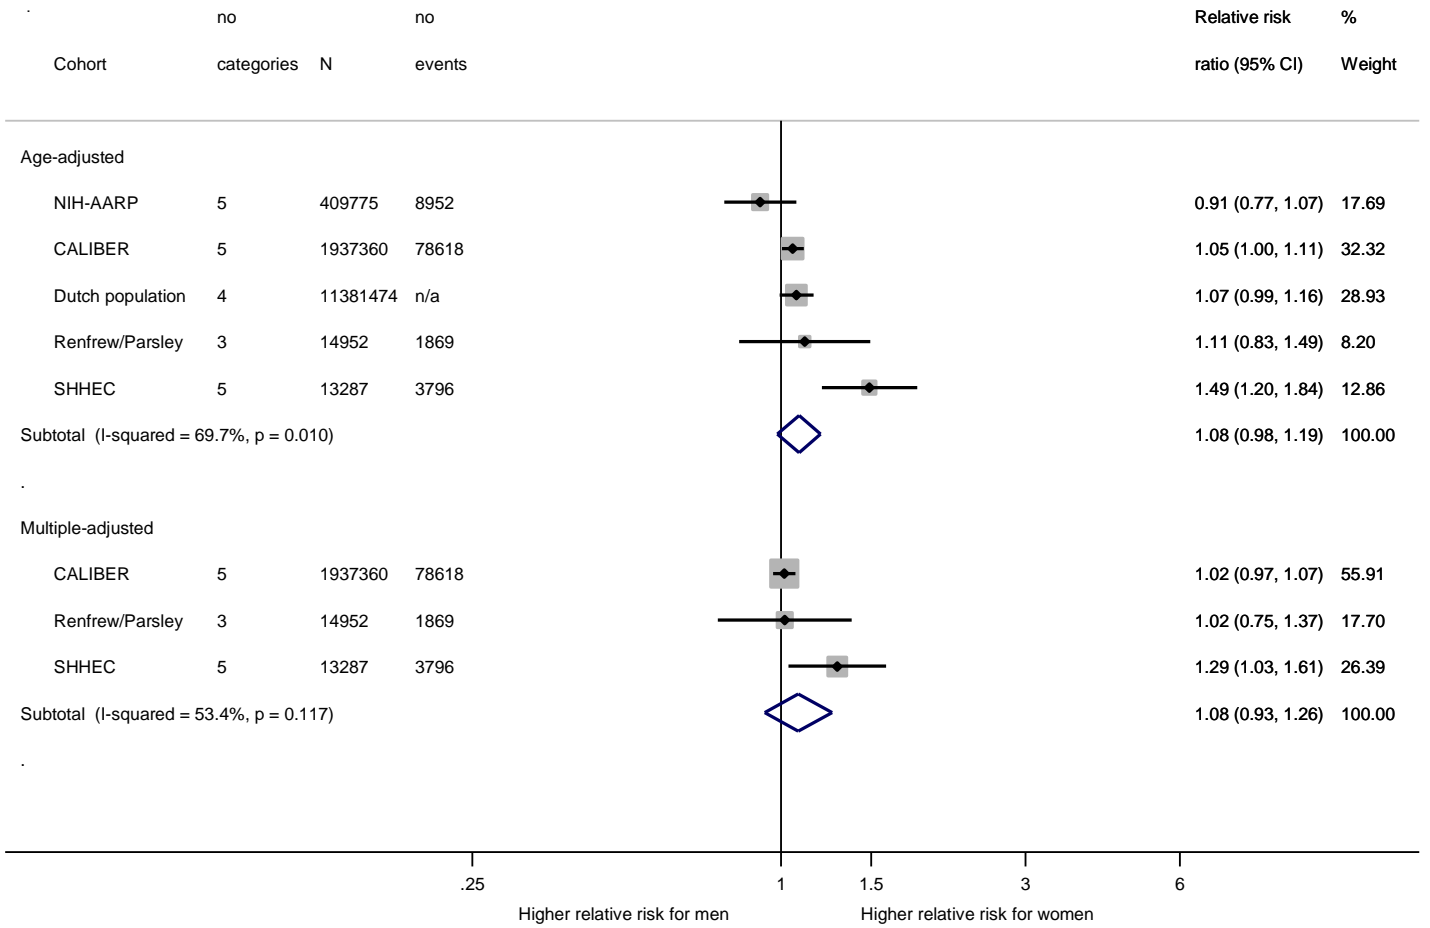

**Appendix figure 10 - Age-adjusted and CVD risk factor-adjusted women-to-men ratio of relative risks of cardiovascular disease, white collar compared to blue collar (or manual) occupation.**

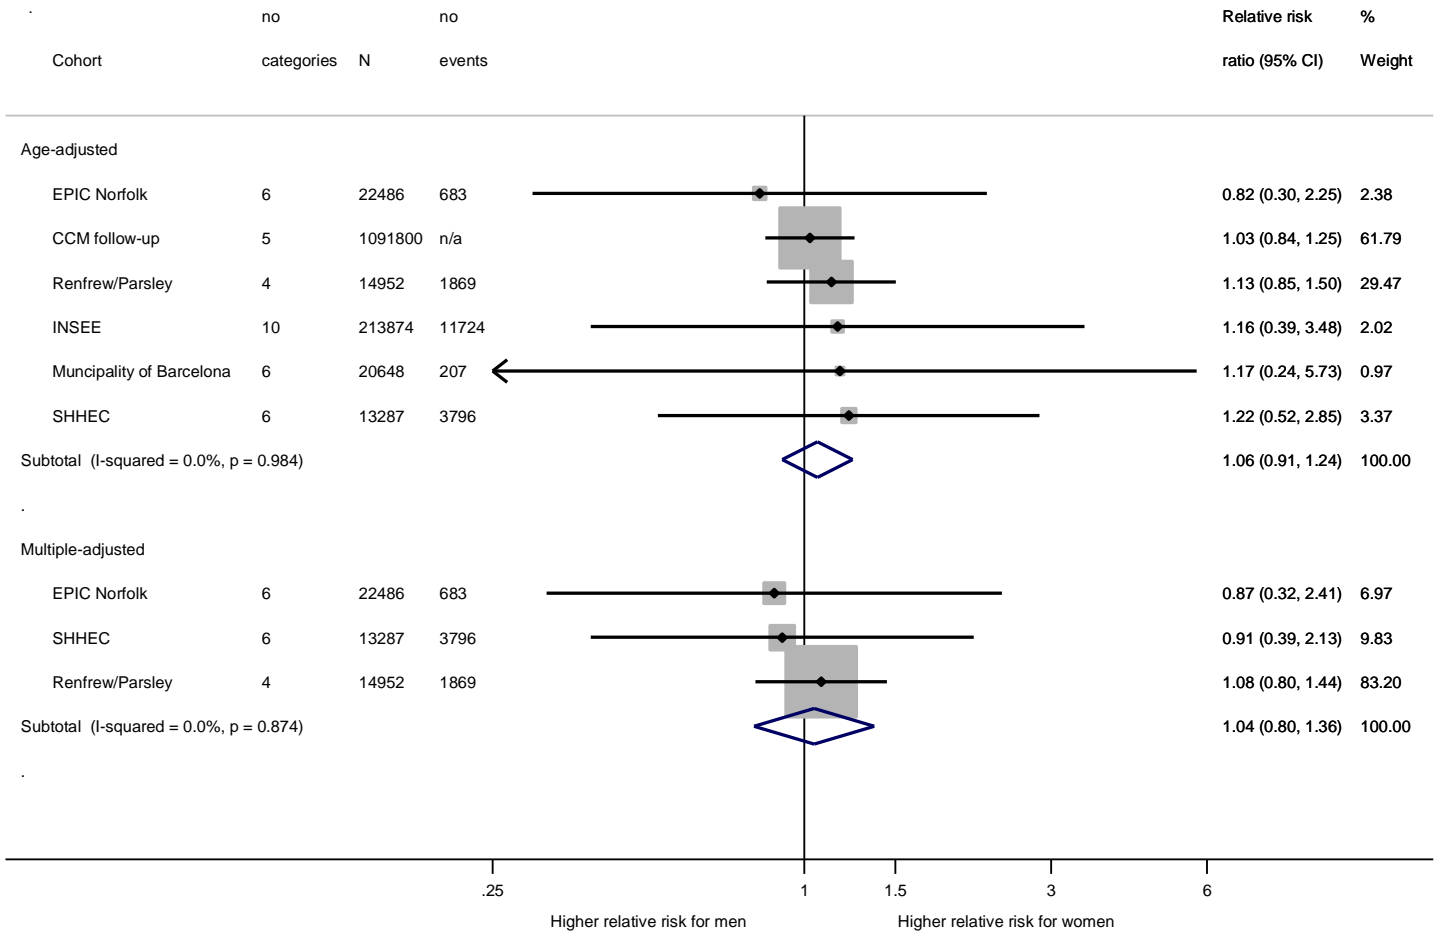



**Appendix Figure 11**

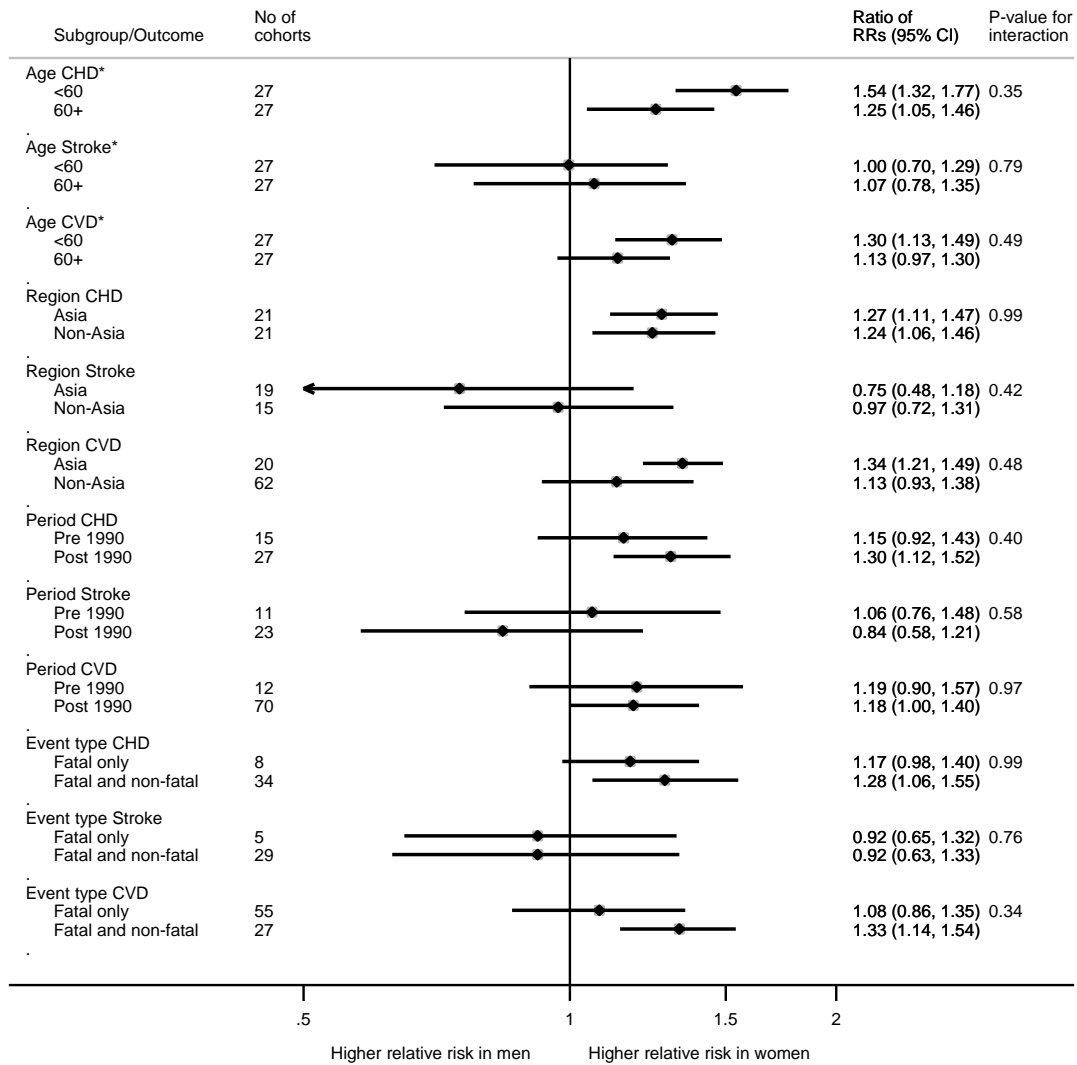

Appendix figure 12

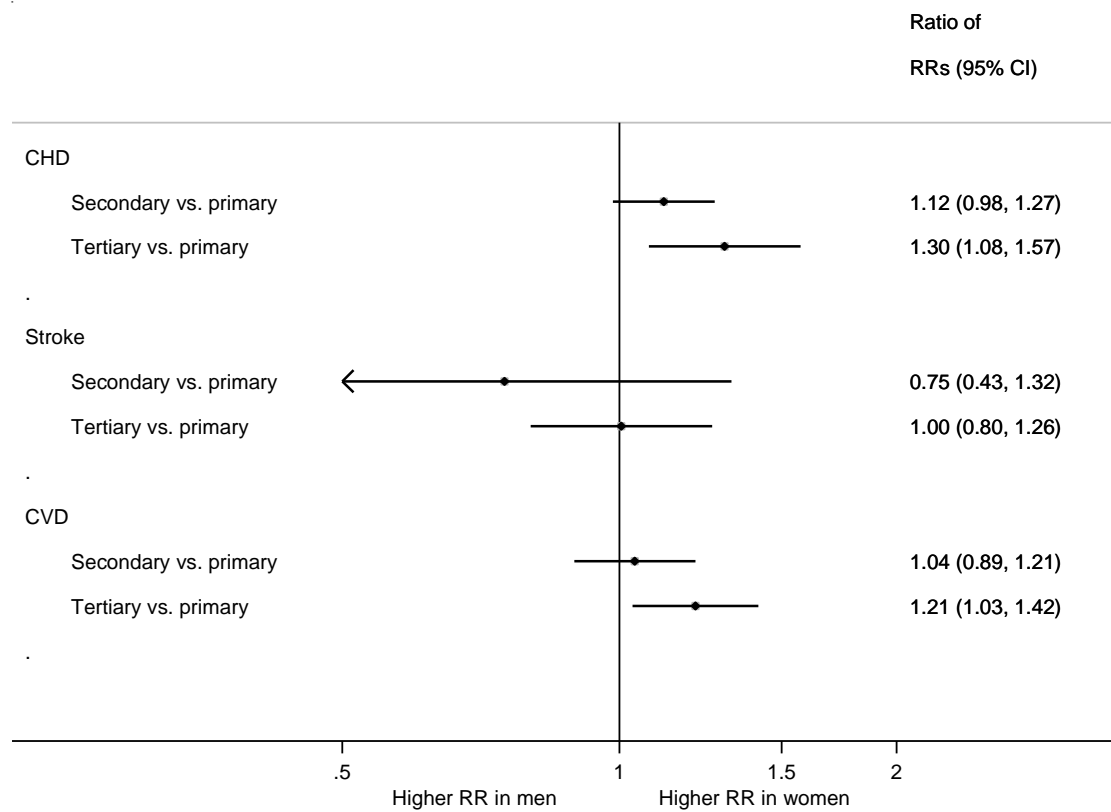



## Appendix references

1. Diez Roux AV, Merkin SS, Arnett D, Chambless L, Massing M, Nieto FJ, et al. Neighborhood of residence and incidence of coronary heart disease. *N Engl J Med* 2001;345(2):99-106.
2. Woodward M, Barzi F, Martiniuk A, Fang X, Gu DF, Imai Y, et al. Cohort profile: the Asia Pacific Cohort Studies Collaboration. *Int J Epidemiol* 2006;35(6):1412-6.
3. Woodward M, Peters SA, Batty GD, Ueshima H, Woo J, Giles GG, et al. Socioeconomic status in relation to cardiovascular disease and cause-specific mortality: a comparison of Asian and Australasian populations in a pooled analysis. *BMJ Open* 2015;5(3):e006408.
4. The Atherosclerosis Risk in Communities (ARIC) Study: design and objectives. The ARIC investigators. *Am J Epidemiol* 1989;129(4):687-702.
5. Deguen S, Lalloue B, Bard D, Havard S, Arveiler D, Zmirou-Navier D. A small-area ecologic study of myocardial infarction, neighborhood deprivation, and sex: a Bayesian modeling approach. *Epidemiology* 2010;21(4):459-66.
6. Lisabeth LD, Diez Roux AV, Escobar JD, Smith MA, Morgenstern LB. Neighborhood environment and risk of ischemic stroke: the brain attack surveillance in Corpus Christi (BASIC) Project. *Am J Epidemiol* 2007;165(3):279-87.
7. Pujades-Rodriguez M, Timmis A, Stogiannis D, Rapsomaniki E, Denaxas S, Shah A, et al. Socioeconomic deprivation and the incidence of 12 cardiovascular diseases in 1.9 million women and men: implications for risk prediction and prevention. *PLoS One* 2014;9(8):e104671.
8. Andersen I, Osler M, Petersen L, Gronbaek M, Prescott E. Income and risk of ischaemic heart disease in men and women in a Nordic welfare country. *International Journal of Epidemiology* 2003;32(3):367-374.
9. Smith BT, Smith PM, Etches J, Mustard CA. Overqualification and risk of all-cause and cardiovascular mortality: evidence from the Canadian Census Mortality Follow-up Study (1991-2001). *Can J Public Health* 2012;103(4):e297-302.
10. Bos V, Kunst AE, Keij-Deerenberg IM, Garssen J, Mackenbach JP. Ethnic inequalities in age- and cause-specific mortality in The Netherlands. *International Journal of Epidemiology* 2004;33(5):1112-1119.
11. Koopman C, van Oeffelen AA, Bots ML, Engelfriet PM, Verschuren WM, van Rossem L, et al. Neighbourhood socioeconomic inequalities in incidence of acute myocardial infarction: a cohort study quantifying age- and gender-specific differences in relative and absolute terms. *BMC Public Health* 2012;12:617.
12. Sundquist K, Malmstrom M, Johansson SE. Neighbourhood deprivation and incidence of coronary heart disease: A multilevel study of 2.6 million women and men in Sweden. *Journal of Epidemiology and Community Health* 2004;58(1):71-77.
13. Cirera L, Huerta JM, Chirlaque MD, Buckland G, Larranaga N, Sanchez MJ, et al. Unfavourable life-course social gradient of coronary heart disease within Spain: a low-incidence welfare-state country. *Int J Public Health* 2013;58(1):65-77.
14. McFadden E, Luben R, Wareham N, Bingham S, Khaw KT. Occupational social class, risk factors and cardiovascular disease incidence in men and women: a prospective study in the European Prospective Investigation of Cancer and Nutrition in Norfolk (EPIC-Norfolk) cohort. *Eur J Epidemiol* 2008;23(7):449-58.
15. McFadden E, Luben R, Wareham N, Bingham S, Khaw KT. Social class, risk factors, and stroke incidence in men and women: a prospective study in the European prospective investigation into cancer in Norfolk cohort. *Stroke* 2009;40(4):1070-7.

16. Lammintausta A, Immonen-Raiha P, Airaksinen JK, Torppa J, Harald K, Ketonen M, et al. Socioeconomic inequalities in the morbidity and mortality of acute coronary events in Finland: 1988 to 2002. *Ann Epidemiol* 2012;22(2):87-93.
17. Jakovljevic D, Sarti C, Sivenius J, Torppa J, Mahonen M, Immonen-Raiha P, et al. Socioeconomic status and ischemic stroke: The FINMONICA Stroke Register. *Stroke* 2001;32(7):1492-8.
18. Harald K, Pajunen P, Jousilahti P, Koskinen S, Vartiainen E, Salomaa V. Modifiable risk factors have an impact on socio-economic differences in coronary heart disease events. *Scand Cardiovasc J* 2006;40(2):87-95.
19. Saurel-Cubizolles MJ, Chastang JF, Menvielle G, Leclerc A, Luce D. Social inequalities in mortality by cause among men and women in France. *J Epidemiol Community Health* 2009;63(3):197-202.
20. Ernstsén L, Bjerkeset O, Krokstad S. Educational inequalities in ischaemic heart disease mortality in 44,000 Norwegian women and men: the influence of psychosocial and behavioural factors. The HUNT Study. *Scand J Public Health* 2010;38(7):678-85.
21. Manor O, Eisenbach Z, Friedlander Y, Kark JD. Educational differentials in mortality from cardiovascular disease among men and women: The Israel Longitudinal Mortality Study. *Annals of Epidemiology* 2004;14(7):453-460.
22. Fujino Y, Tamakoshi A, Iso H, Inaba Y, Kubo T, Ide R, et al. A nationwide cohort study of educational background and major causes of death among the elderly population in Japan. *Prev Med* 2005;40(4):444-51.
23. Honjo K, Tsutsumi A, Kayaba K, Jichi Medical School Cohort Study G. Socioeconomic indicators and cardiovascular disease incidence among Japanese community residents: the Jichi Medical School Cohort Study. *Int J Behav Med* 2010;17(1):58-66.
24. Ito S, Takachi R, Inoue M, Kurahashi N, Iwasaki M, Sasazuki S, et al. Education in relation to incidence of and mortality from cancer and cardiovascular disease in Japan. *Eur J Public Health* 2008;18(5):466-72.
25. Vescio MF, Smith GD, Giampaoli S. Socio-economic-position overall and cause-specific mortality in an Italian rural population. *Eur J Epidemiol* 2003;18(11):1051-8.
26. Morrison C, Woodward M, Leslie W, Tunstall-Pedoe H. Effect of socioeconomic group on incidence of, management of, and survival after myocardial infarction and coronary death: analysis of community coronary event register. *BMJ* 1997;314(7080):541-6.
27. Malyutina S, Bobak M, Simonova G, Gafarov V, Nikitin Y, Marmot M. Education, marital status, and total and cardiovascular mortality in Novosibirsk, Russia: a prospective cohort study. *Ann Epidemiol* 2004;14(4):244-9.
28. Veronesi G, Ferrario MM, Chambless LE, Segà R, Mancina G, Corrao G, et al. Gender differences in the association between education and the incidence of cardiovascular events in Northern Italy. *Eur J Public Health* 2011;21(6):762-7.
29. Ferrario MM, Veronesi G, Chambless LE, Tunstall-Pedoe H, Kuulasmaa K, Salomaa V, et al. The contribution of educational class in improving accuracy of cardiovascular risk prediction across European regions: The MORGAM Project Cohort Component. *Heart* 2014;100(15):1179-87.
30. Pednekar MS, Gupta R, Gupta PC. Illiteracy, low educational status, and cardiovascular mortality in India. *BMC Public Health* 2011;11:567.
31. Borrell C, Cortes I, Artazcoz L, Molinero E, Moncada S. Social inequalities in mortality in a retrospective cohort of civil servants in Barcelona. *Int J Epidemiol* 2003;32(3):386-9.

32. Thurston RC, Kubzansky LD, Kawachi I, Berkman LF. Is the association between socioeconomic position and coronary heart disease stronger in women than in men? *Am J Epidemiol* 2005;162(1):57-65.
33. Plan and operation of the Third National Health and Nutrition Examination Survey, 1988-94. Series 1: programs and collection procedures. *Vital Health Stat* 1 1994(32):1-407.
34. Gillum RF, Mussolino ME. Education, poverty, and stroke incidence in whites and blacks: the NHANES I Epidemiologic Follow-up Study. *J Clin Epidemiol* 2003;56(2):188-95.
35. Major JM, Doubeni CA, Freedman ND, Park Y, Lian M, Hollenbeck AR, et al. Neighborhood socioeconomic deprivation and mortality: NIH-AARP diet and health study. *PLoS One* 2010;5(11):e15538.
36. Taylor R, Chey T, Bauman A, Webster I. Socio-economic, migrant and geographic differentials in coronary heart disease occurrence in New South Wales. *Aust N Z J Public Health* 1999;23(1):20-6.
37. Heeley EL, Wei JW, Carter K, Islam MS, Thrift AG, Hankey GJ, et al. Socioeconomic disparities in stroke rates and outcome: pooled analysis of stroke incidence studies in Australia and New Zealand. *Med J Aust* 2011;195(1):10-4.
38. Malki N, Koupil I, Eloranta S, Weibull CE, Tiikkaja S, Ingelsson E, et al. Temporal trends in incidence of myocardial infarction and ischemic stroke by socioeconomic position in Sweden 1987-2010. *PLoS One* 2014;9(8):e105279.
39. Li C, Hedblad B, Rosvall M, Buchwald F, Khan FA, Engstrom G. Stroke incidence, recurrence, and case-fatality in relation to socioeconomic position: a population-based study of middle-aged Swedish men and women. *Stroke* 2008;39(8):2191-6.
40. Hempler NF, Larsen FB, Nielsen SS, Diderichsen F, Andreasen AH, Jorgensen T. A registry-based follow-up study, comparing the incidence of cardiovascular disease in native Danes and immigrants born in Turkey, Pakistan and the former Yugoslavia: do social inequalities play a role? *BMC public health* 2011;11:662.
41. Hart CL, Hole DJ, Smith GD. The contribution of risk factors to stroke differentials, by socioeconomic position in adulthood: the Renfrew/Paisley Study. *Am J Public Health* 2000;90(11):1788-91.
42. Smith GD, Hart C, Watt G, Hole D, Hawthorne V. Individual social class, area-based deprivation, cardiovascular disease risk factors, and mortality: the Renfrew and Paisley Study. *J Epidemiol Community Health* 1998;52(6):399-405.
43. Woodward M, Brindle P, Tunstall-Pedoe H. Adding social deprivation and family history to cardiovascular risk assessment: the ASSIGN score from the Scottish Heart Health Extended Cohort (SHHEC). *Heart* 2007;93(2):172-6.
44. Toivanen S. Income differences in stroke mortality: a 12-year follow-up study of the Swedish working population. *Scand J Public Health* 2011;39(8):797-804.
45. Strand BH, Tverdal A. Can cardiovascular risk factors and lifestyle explain the educational inequalities in mortality from ischaemic heart disease and from other heart diseases? 26 year follow up of 50,000 Norwegian men and women. *J Epidemiol Community Health* 2004;58(8):705-9.
46. Petrelli A, Gnani R, Marinacci C, Costa G. Socioeconomic inequalities in coronary heart disease in Italy: a multilevel population-based study. *Soc Sci Med* 2006;63(2):446-56.
47. Marmot M, Shipley M, Brunner E, Hemingway H. Relative contribution of early life and adult socioeconomic factors to adult morbidity in the Whitehall II study. *J Epidemiol Community Health* 2001;55(5):301-7.
48. Steenland K, Henley J, Calle E, Thun M. Individual- and area-level socioeconomic status variables as predictors of mortality in a cohort of 179,383 persons. *Am J Epidemiol* 2004;159(11):1047-56.

49. Iglund J, Vollset SE, Nygard OK, Sulo G, Ebbing M, Tell GS. Educational inequalities in acute myocardial infarction incidence in Norway: a nationwide cohort study. *PLoS One* 2014;9(9):e106898.
